# Supplementary material
Source: Springer Nature journal article supplement (https://www.springerprofessional.de/resource/supplementary/40192_2013_13_MOESM4_ESM.pdf/11899492)

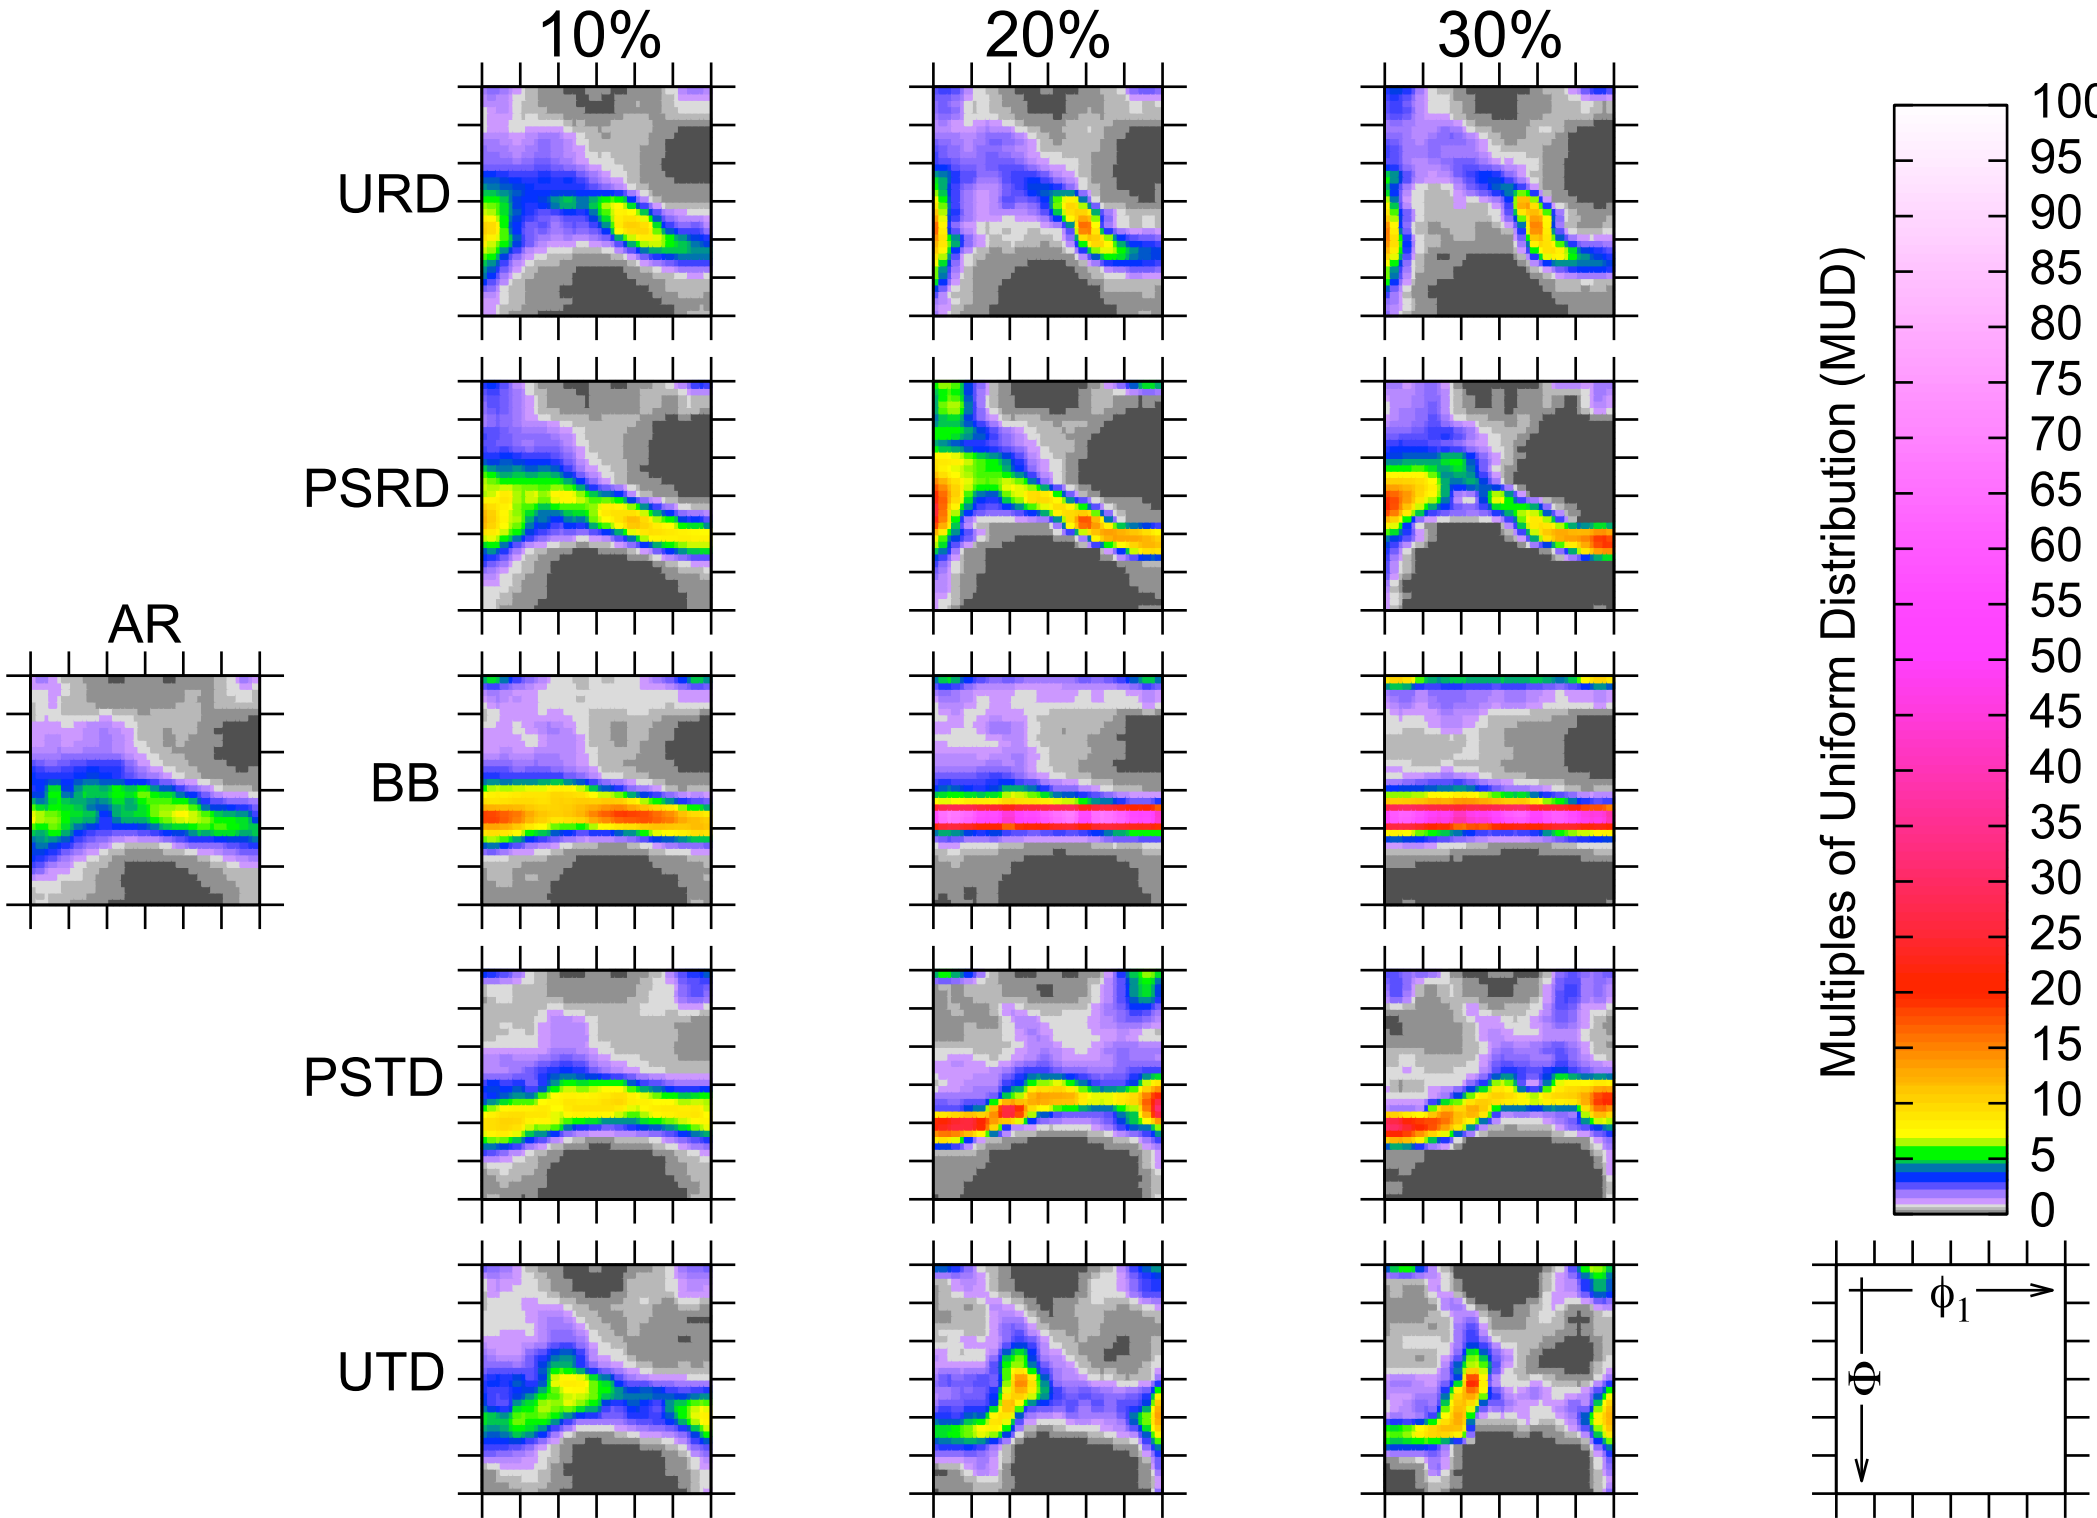

Supplement: MOESM4 [file 11899492]
